# Supplementary material for: Prevalence of comorbidities in rheumatoid arthritis and evaluation of their monitoring: results of an international, cross-sectional study (COMORA)
Source: HighWire-hosted journal article supplement (doi:10.1136/annrheumdis-2013-204223), 2013-10-05
Supplement: annrheumdis-2013-204223supp_tables.pdf [file annrheumdis-2013-204223supp_tables.pdf]

## TABLES S1-S12

**Table S1. Baseline characteristics by country of the 3920 patients analyzed in the COMORA study**

| Country      | Number of patients | Female (%) | Age (years)<br>Mean±SD | Current smoker (%) | University level (%) | Married (%) | BMI overweight (%) | Currently employed (%) |
|--------------|--------------------|------------|------------------------|--------------------|----------------------|-------------|--------------------|------------------------|
| Argentina    | 200                | 88         | 56 ± 12                | 12                 | 14                   | 67          | 40                 | 28                     |
| Austria      | 204                | 82         | 59 ± 13                | 48                 | 9                    | 65          | 37                 | 30                     |
| Egypt        | 308                | 85         | 48 ± 11                | 7                  | 20                   | 79          | 31                 | 25                     |
| France       | 411                | 82         | 58 ± 12                | 16                 | 28                   | 66          | 30                 | 33                     |
| Germany      | 209                | 73         | 59 ± 12                | 17                 | 16                   | 65          | 34                 | 35                     |
| Hungary      | 201                | 89         | 59 ± 13                | 23                 | 26                   | 56          | 36                 | 25                     |
| Italy        | 228                | 77         | 61 ± 12                | 12                 | 5                    | 77          | 40                 | 25                     |
| Japan        | 207                | 81         | 63 ± 13                | 0                  | 19                   | 70          | 15                 | 34                     |
| Korea        | 400                | 84         | 56 ± 12                | 9                  | 25                   | 81          | 18                 | 30                     |
| Morocco      | 227                | 86         | 48 ± 13                | 1                  | 16                   | 70          | 39                 | 16                     |
| Netherlands  | 139                | 66         | 59 ± 14                | 41                 | 75                   | 86          | 0                  | 36                     |
| Spain        | 200                | 79         | 58 ± 12                | 9                  | 16                   | 70          | 33                 | 35                     |
| Taiwan       | 313                | 82         | 54 ± 13                | 9                  | 20                   | 79          | 26                 | 35                     |
| UK           | 43                 | 79         | 59 ± 13                | 12                 | 33                   | 67          | 34                 | 37                     |
| Uruguay      | 30                 | 87         | 58 ± 11                | 7                  | 13                   | 62          | 40                 | 40                     |
| USA          | 400                | 77         | 56 ± 14                | 14                 | 59                   | 64          | 33                 | 46                     |
| Venezuela    | 200                | 91         | 54 ± 11                | 7                  | 20                   | 50          | 37                 | 28                     |
| <b>Total</b> | <b>3920</b>        | <b>82</b>  | <b>56 ± 13</b>         | <b>13</b>          | <b>25</b>            | <b>70</b>   | <b>31</b>          | <b>31</b>              |

**Table S2. Characteristics of rheumatoid arthritis by country among the 3920 patients analyzed in the COMORA study**

| Country      | Number of patients | Duration<br>Mean±SD | DAS28-ESR<br>Mean±SD | HAQ<br>Mean±SD | Current prednisone intake (%) | NSAID intake (%) | MTX (ever) (%) | Biotherapy (any, ever) (%) |
|--------------|--------------------|---------------------|----------------------|----------------|-------------------------------|------------------|----------------|----------------------------|
| Argentina    | 200                | 11±9                | 4.0±1.3              | 1.1±0.6        | 54                            | 65               | 97             | 45                         |
| Austria      | 204                | 11±10               | 3.3±1.3              | 1.0±0.6        | 32                            | 50               | 94             | 59                         |
| Egypt        | 308                | 8±7                 | 5.3±1.5              | 1.3±0.7        | 58                            | 66               | 95             | 7                          |
| France       | 411                | 14±10               | 3.1±1.5              | 0.9±0.6        | 45                            | 33               | 92             | 69                         |
| Germany      | 209                | 10±8                | 3.6±1.6              | 1.0±0.6        | 78                            | 46               | 91             | 53                         |
| Hungary      | 201                | 10±9                | 3.9±1.3              | 1.4±0.7        | 48                            | 52               | 93             | 23                         |
| Italy        | 228                | 11±9                | 3.7±1.4              | 1.0±0.6        | 68                            | 39               | 79             | 44                         |
| Japan        | 207                | 9±9                 | 3.1±1.3              | 0.9±0.6        | 35                            | 46               | 79             | 44                         |
| Korea        | 400                | 7±6                 | 3.5±1.4              | 0.9±0.6        | 74                            | 78               | 91             | 14                         |
| Morocco      | 227                | 7±7                 | 5.2±1.6              | 1.5±0.8        | 82                            | 25               | 81             | 24                         |
| Netherlands  | 139                | NA±NA               | 2.6±1.1              | 1.2±0.6        | 13                            | 42               | 91             | 41                         |
| Spain        | 200                | 10±8                | 3.3±1.4              | 1.1±0.7        | 53                            | 56               | 97             | 43                         |
| Taiwan       | 313                | 8±6                 | 3.8±1.3              | 0.7±0.5        | 75                            | 94               | 88             | 14                         |
| UK           | 43                 | 12±14               | 3.7±1.5              | 1.2±0.7        | 9                             | 37               | 98             | 77                         |
| Uruguay      | 30                 | 8±7                 | 3.3±1.9              | 1.0±0.7        | 43                            | 39               | 90             | 3                          |
| USA          | 400                | 8±10                | 3.6±1.4              | 1.0±0.6        | 27                            | 53               | 80             | 54                         |
| Venezuela    | 200                | 8±7                 | 3.9±1.5              | 0.9±0.6        | 70                            | 67               | 86             | 60                         |
| <b>Total</b> | <b>3920</b>        | <b>10±9</b>         | <b>3.7±1.6</b>       | <b>1.0±0.7</b> | <b>54</b>                     | <b>55</b>        | <b>89</b>      | <b>39</b>                  |

**Table S3. Prevalence of comorbidities: cardiovascular diseases by country**

| <b>Country</b> | <b>Number of patients</b> | <b>Myocardial infarction (%)</b> | <b>Stroke (%)</b> | <b>Myocardial infarction OR Stroke (%)</b> |
|----------------|---------------------------|----------------------------------|-------------------|--------------------------------------------|
| Argentina      | 200                       | 2                                | 2                 | 4                                          |
| Austria        | 204                       | 5                                | 1                 | 6                                          |
| Egypt          | 308                       | 3                                | 2                 | 5                                          |
| France         | 411                       | 3                                | 2                 | 5                                          |
| Germany        | 209                       | 7                                | 3                 | 10                                         |
| Hungary        | 201                       | 17                               | 1                 | 17                                         |
| Italy          | 228                       | 6                                | 2                 | 8                                          |
| Japan          | 207                       | 5                                | 1                 | 6                                          |
| Korea          | 400                       | 4                                | 2                 | 5                                          |
| Morocco        | 227                       | 1                                | 1                 | 1                                          |
| Netherlands    | 139                       | 7                                | 5                 | 12                                         |
| Spain          | 200                       | 5                                | 1                 | 6                                          |
| Taiwan         | 313                       | 2                                | 1                 | 3                                          |
| UK             | 43                        | 2                                | 0                 | 2                                          |
| Uruguay        | 30                        | 7                                | 3                 | 7                                          |
| USA            | 400                       | 5                                | 3                 | 8                                          |
| Venezuela      | 200                       | 2                                | 1                 | 2                                          |
| <b>Total</b>   | <b>3920</b>               | <b>5</b>                         | <b>2</b>          | <b>6</b>                                   |

**Table S4. Prevalence of comorbidities: cancers by country**

| <b>Country</b> | <b>Number of patients</b> | <b>Prostatic cancer (%)</b> | <b>Breast cancer (%)</b> | <b>Uterus cancer (%)</b> | <b>Colon cancer (%)</b> | <b>Cutaneous melanoma (%)</b> | <b>Basal cell carcinoma of skin (%)</b> | <b>Lung Cancer (%)</b> | <b>Lymphoma (%)</b> |
|----------------|---------------------------|-----------------------------|--------------------------|--------------------------|-------------------------|-------------------------------|-----------------------------------------|------------------------|---------------------|
| Argentina      | 200                       | 0                           | 2                        | 1                        | 0                       | 0                             | 0                                       | 1                      | 1                   |
| Austria        | 204                       | 0                           | 3                        | 3                        | 1                       | 2                             | 3                                       | 1                      | 0                   |
| Egypt          | 308                       | 0                           | 0                        | 0                        | 0                       | 0                             | 0                                       | 0                      | 0                   |
| France         | 411                       | 1                           | 5                        | 2                        | 2                       | 1                             | 4                                       | 0                      | 1                   |
| Germany        | 209                       | 4                           | 3                        | 2                        | 1                       | 1                             | 2                                       | 0                      | 1                   |
| Hungary        | 201                       | 0                           | 3                        | 2                        | 1                       | 0                             | 5                                       | 0                      | 0                   |
| Italy          | 228                       | 2                           | 2                        | 2                        | 1                       | 1                             | 3                                       | 1                      | 0                   |
| Japan          | 207                       | 0                           | 2                        | 5                        | 1                       | 1                             | 0                                       | 0                      | 1                   |
| Korea          | 400                       | 0                           | 1                        | 1                        | 0                       | 0                             | 0                                       | 1                      | 0                   |
| Morocco        | 227                       | 0                           | 0                        | 1                        | 0                       | 1                             | 1                                       | 1                      | 0                   |
| Netherlands    | 139                       | 2                           | 6                        | 0                        | 1                       | 0                             | 6                                       | 0                      | 0                   |
| Spain          | 200                       | 0                           | 2                        | 1                        | 1                       | 1                             | 3                                       | 0                      | 0                   |
| Taiwan         | 313                       | 0                           | 1                        | 0                        | 0                       | 0                             | 0                                       | 0                      | 0                   |
| UK             | 43                        | 0                           | 0                        | 9                        | 0                       | 0                             | 0                                       | 5                      | 0                   |
| Uruguay        | 30                        | 0                           | 0                        | 4                        | 0                       | 0                             | 0                                       | 0                      | 0                   |
| USA            | 400                       | 6                           | 3                        | 2                        | 1                       | 2                             | 6                                       | 0                      | 2                   |
| Venezuela      | 200                       | 5                           | 3                        | 2                        | 1                       | 1                             | 1                                       | 1                      | 0                   |
| <b>Total</b>   | <b>3920</b>               | <b>2</b>                    | <b>2</b>                 | <b>2</b>                 | <b>1</b>                | <b>1</b>                      | <b>2</b>                                | <b>0</b>               | <b>0</b>            |

**Table S5. Prevalence of comorbidities: hepatitis by country**

| <b>Country</b> | <b>Number of patients</b> | <b>Hepatitis B (%)</b> | <b>Hepatitis C (%)</b> |
|----------------|---------------------------|------------------------|------------------------|
| Argentina      | 200                       | 2                      | 1                      |
| Austria        | 204                       | 2                      | 1                      |
| Egypt          | 308                       | 0                      | 7                      |
| France         | 411                       | 2                      | 0                      |
| Germany        | 209                       | 4                      | 1                      |
| Hungary        | 201                       | 2                      | 2                      |
| Italy          | 228                       | 9                      | 7                      |
| Japan          | 207                       | 1                      | 2                      |
| Korea          | 400                       | 2                      | 0                      |
| Morocco        | 227                       | 1                      | 2                      |
| Netherlands    | 139                       | 1                      | 0                      |
| Spain          | 200                       | 5                      | 1                      |
| Taiwan         | 313                       | 7                      | 5                      |
| UK             | 43                        | 0                      | 0                      |
| Uruguay        | 30                        | 0                      | 0                      |
| USA            | 400                       | 3                      | 2                      |
| Venezuela      | 200                       | 2                      | 1                      |
| <b>Total</b>   | <b>3920</b>               | <b>3</b>               | <b>2</b>               |

**Table S6. Prevalence of comorbidities: gastrointestinal diseases by country**

| <b>Country</b> | <b>Number of patients</b> | <b>Gastrointestinal ulcers (%)</b> | <b>Diverticulitis requiring surgery (%)</b> |
|----------------|---------------------------|------------------------------------|---------------------------------------------|
| Argentina      | 200                       | 10                                 | 0.0                                         |
| Austria        | 204                       | 12                                 | 9.8                                         |
| Egypt          | 308                       | 22                                 | 0.0                                         |
| France         | 411                       | 7                                  | 7.3                                         |
| Germany        | 209                       | 14                                 | 14.4                                        |
| Hungary        | 201                       | 16                                 | 0.0                                         |
| Italy          | 228                       | 8                                  | 8.8                                         |
| Japan          | 207                       | 14                                 | 0.0                                         |
| Korea          | 400                       | 12                                 | 10.0                                        |
| Morocco        | 227                       | 1                                  | 0.0                                         |
| Netherlands    | 139                       | 1                                  | 0.0                                         |
| Spain          | 200                       | 3                                  | 0.0                                         |
| Taiwan         | 313                       | 19                                 | 0.0                                         |
| UK             | 43                        | 9                                  | 0.0                                         |
| Uruguay        | 30                        | 10                                 | 0.0                                         |
| USA            | 400                       | 11                                 | 5.0                                         |
| Venezuela      | 200                       | 1                                  | 0.0                                         |
| <b>Total</b>   | <b>3920</b>               | <b>11</b>                          | <b>0.4</b>                                  |

**Table S7. Prevalence of comorbidities: pulmonary and psychiatric diseases by country**

| <b>Country</b> | <b>Number of patients</b> | <b>COPD (%)</b> | <b>Asthma (%)</b> | <b>Depression (%)</b> |
|----------------|---------------------------|-----------------|-------------------|-----------------------|
| Argentina      | 200                       | 6               | 4                 | 18                    |
| Austria        | 204                       | 5               | 2                 | 19                    |
| Egypt          | 308                       | 2               | 7                 | 10                    |
| France         | 411                       | 2               | 7                 | 21                    |
| Germany        | 209                       | 4               | 5                 | 17                    |
| Hungary        | 201                       | 8               | 11                | 15                    |
| Italy          | 228                       | 5               | 3                 | 19                    |
| Japan          | 207                       | 1               | 5                 | 5                     |
| Korea          | 400                       | 1               | 1                 | 4                     |
| Morocco        | 227                       | 1               | 1                 | 2                     |
| Netherlands    | 139                       | 7               | 4                 | 7                     |
| Spain          | 200                       | 2               | 5                 | 27                    |
| Taiwan         | 313                       | 0               | 4                 | 4                     |
| UK             | 43                        | 7               | 9                 | 28                    |
| Uruguay        | 30                        | 7               | 7                 | 30                    |
| USA            | 400                       | 8               | 21                | 33                    |
| Venezuela      | 200                       | 2               | 12                | 15                    |
| <b>Total</b>   | <b>3920</b>               | <b>4</b>        | <b>7</b>          | <b>15</b>             |

COPD: chronic pulmonary disease

**Table S8. Prevalence of risk factors for cardiovascular disease by country**

| <b>Country</b> | <b>Number of patients</b> | <b>Current smoker (%)</b> | <b>Family history (%)</b> | <b>Hypertension (%)</b> | <b>Diabetes (%)</b> | <b>Dyslipidemia (%)</b> | <b>Framingham score &gt;20% (%)</b> |
|----------------|---------------------------|---------------------------|---------------------------|-------------------------|---------------------|-------------------------|-------------------------------------|
| Argentina      | 200                       | 20                        | 16                        | 41                      | 6                   | 36                      | 40                                  |
| Austria        | 204                       | 48                        | 13                        | 52                      | 12                  | 45                      | 59                                  |
| Egypt          | 308                       | 11                        | 13                        | 34                      | 17                  | 11                      | 29                                  |
| France         | 411                       | 20                        | 14                        | 36                      | 8                   | 38                      | 42                                  |
| Germany        | 209                       | 19                        | 17                        | 49                      | 14                  | 31                      | 51                                  |
| Hungary        | 201                       | 29                        | 14                        | 57                      | 15                  | 46                      | 49                                  |
| Italy          | 228                       | 22                        | 23                        | 54                      | 15                  | 39                      | 59                                  |
| Japan          | 207                       | 17                        | 11                        | 37                      | 12                  | 34                      | 48                                  |
| Korea          | 400                       | 11                        | 7                         | 40                      | 21                  | 23                      | 35                                  |
| Morocco        | 227                       | 3                         | 6                         | 22                      | 14                  | 15                      | 27                                  |
| Netherlands    | 139                       | 30                        | 0                         | 40                      | 14                  | 27                      | 52                                  |
| Spain          | 200                       | 25                        | 10                        | 41                      | 12                  | 46                      | 51                                  |
| Taiwan         | 313                       | 15                        | 10                        | 30                      | 10                  | 10                      | 34                                  |
| UK             | 43                        | 23                        | 23                        | 35                      | 7                   | 16                      | 51                                  |
| Uruguay        | 30                        | 30                        | 24                        | 57                      | 13                  | 63                      | 57                                  |
| USA            | 400                       | 23                        | 25                        | 39                      | 21                  | 38                      | 42                                  |
| Venezuela      | 200                       | 20                        | 29                        | 51                      | 11                  | 57                      | 44                                  |
| <b>Total</b>   | <b>3920</b>               | <b>20</b>                 | <b>14</b>                 | <b>40</b>               | <b>14</b>           | <b>32</b>               | <b>43</b>                           |



**Table S9. Prevalence of selected risk factors for cancer by country**

| <b>Country</b> | <b>Number of patients</b> | <b>Prostatic Family history (%)</b> | <b>Breast Family history (%)</b> | <b>Colon Family history (1) (%)</b> | <b>Colon IBD (2) (%)</b> | <b>Colon (1) OR (2) (%)</b> | <b>Skin naevi&gt;40 (%)</b> |
|----------------|---------------------------|-------------------------------------|----------------------------------|-------------------------------------|--------------------------|-----------------------------|-----------------------------|
| Argentina      | 200                       | 4                                   | 13                               | 8                                   | 1                        | 8                           | 2                           |
| Austria        | 204                       | 3                                   | 17                               | 11                                  | 2                        | 12                          | 8                           |
| Egypt          | 308                       | 0                                   | 5                                | 2                                   | 0                        | 2                           | 0                           |
| France         | 411                       | 1                                   | 9                                | 10                                  | 1                        | 11                          | 8                           |
| Germany        | 209                       | 2                                   | 12                               | 6                                   | 1                        | 7                           | 8                           |
| Hungary        | 201                       | 0                                   | 15                               | 5                                   | 3                        | 8                           | 4                           |
| Italy          | 228                       | 6                                   | 17                               | 11                                  | 0                        | 11                          | 12                          |
| Japan          | 207                       | 0                                   | 6                                | 6                                   | 1                        | 7                           | 1                           |
| Korea          | 400                       | 0                                   | 3                                | 1                                   | 0                        | 1                           | 0                           |
| Morocco        | 227                       | 0                                   | 2                                | 1                                   | 0                        | 0                           | 1                           |
| Netherlands    | 139                       | 2                                   | 1                                | 1                                   | 1                        | 2                           | 1                           |
| Spain          | 200                       | 0                                   | 18                               | 12                                  | 2                        | 13                          | 8                           |
| Taiwan         | 313                       | 2                                   | 5                                | 5                                   | 2                        | 6                           | 3                           |
| UK             | 43                        | 0                                   | 21                               | 19                                  | 7                        | 23                          | 5                           |
| Uruguay        | 30                        | 25                                  | 4                                | 7                                   | 3                        | 10                          | 10                          |
| USA            | 400                       | 5                                   | 27                               | 12                                  | 5                        | 15                          | 3                           |
| Venezuela      | 200                       | 17                                  | 10                               | 3                                   | 1                        | 3                           | 1                           |
| <b>Total</b>   | <b>3920</b>               | <b>2</b>                            | <b>11</b>                        | <b>6</b>                            | <b>1</b>                 | <b>7</b>                    | <b>4</b>                    |

IBD: inflammatory bowel disease

**Table S10. Proportion of patients optimally monitored for cardiovascular disease by country**

| <b>Country</b> | <b>Number of patients</b> | <b>Yearly risk evaluation (%)</b> | <b>Anti-thrombotic therapy (%)</b> | <b>Anti-hypertensive therapy (%)</b> | <b>Lipid Therapy (%)</b> |
|----------------|---------------------------|-----------------------------------|------------------------------------|--------------------------------------|--------------------------|
| Argentina      | 200                       | 78                                | 6                                  | 35                                   | 8                        |
| Austria        | 204                       | 80                                | 12                                 | 42                                   | 21                       |
| Egypt          | 308                       | 15                                | 10                                 | 22                                   | 6                        |
| France         | 411                       | 65                                | 8                                  | 29                                   | 20                       |
| Germany        | 209                       | 39                                | 15                                 | 46                                   | 17                       |
| Hungary        | 201                       | 98                                | 16                                 | 51                                   | 21                       |
| Italy          | 228                       | 90                                | 22                                 | 52                                   | 20                       |
| Japan          | 207                       | 78                                | 8                                  | 31                                   | 21                       |
| Korea          | 400                       | 56                                | 8                                  | 37                                   | 15                       |
| Morocco        | 227                       | 71                                | 4                                  | 20                                   | 7                        |
| Netherlands    | 139                       | 20                                | 20                                 | 35                                   | 13                       |
| Spain          | 200                       | 82                                | 9                                  | 31                                   | 30                       |
| Taiwan         | 313                       | 45                                | 4                                  | 22                                   | 5                        |
| UK             | 43                        | 16                                | 7                                  | 26                                   | 14                       |
| Uruguay        | 30                        | 87                                | 13                                 | 57                                   | 47                       |
| USA            | 400                       | 27                                | 24                                 | 38                                   | 25                       |
| Venezuela      | 200                       | 97                                | 16                                 | 48                                   | 33                       |
| <b>Total</b>   | <b>3920</b>               | 59                                | 12                                 | 35                                   | 17                       |

**Table S11. Proportion of patients optimally monitored for infectious diseases by country**

| <b>Country</b> | <b>Number of patients</b> | <b>Yearly dentist visit (%)</b> | <b>Yearly influenza vaccination (%)</b> | <b>5 yearly pneumococcal vaccination (%)</b> |
|----------------|---------------------------|---------------------------------|-----------------------------------------|----------------------------------------------|
| Argentina      | 200                       | 52                              | 39                                      | 37                                           |
| Austria        | 204                       | 44                              | 9                                       | 10                                           |
| Egypt          | 308                       | 24                              | 1                                       | 2                                            |
| France         | 411                       | 56                              | 29                                      | 57                                           |
| Germany        | 209                       | 74                              | 42                                      | 19                                           |
| Hungary        | 201                       | 36                              | 24                                      | 4                                            |
| Italy          | 228                       | 37                              | 26                                      | 1                                            |
| Japan          | 207                       | 59                              | 66                                      | 13                                           |
| Korea          | 400                       | 43                              | 31                                      | 11                                           |
| Morocco        | 227                       | 9                               | 0                                       | 0                                            |
| Netherlands    | 139                       | 0                               | 0                                       | 0                                            |
| Spain          | 200                       | 42                              | 7                                       | 18                                           |
| Taiwan         | 313                       | 42                              | 9                                       | 1                                            |
| UK             | 43                        | 70                              | 30                                      | 26                                           |
| Uruguay        | 30                        | 58                              | 39                                      | 46                                           |
| USA            | 400                       | 52                              | 46                                      | 29                                           |
| Venezuela      | 200                       | 31                              | 18                                      | 12                                           |
| <b>Total</b>   | <b>3920</b>               | <b>42</b>                       | <b>25</b>                               | <b>17</b>                                    |

**Table S12. Proportion of patients optimally screened for cancer by country**

| <b>Country</b> | <b><u>Prostatic</u></b><br><b>(%)</b> | <b><u>Breast</u></b><br><b>(%)</b> | <b><u>Uterus</u></b><br><b>(%)</b> | <b><u>Colon</u></b><br><b>(%)</b> | <b><u>Skin</u></b><br><b>(%)</b> |
|----------------|---------------------------------------|------------------------------------|------------------------------------|-----------------------------------|----------------------------------|
| Argentina      | 35                                    | 62                                 | 75                                 | 11                                | 52                               |
| Austria        | 70                                    | 58                                 | 77                                 | 43                                | 49                               |
| Egypt          | 0                                     | 1                                  | 1                                  | 2                                 | 1                                |
| France         | 54                                    | 65                                 | 69                                 | 37                                | 48                               |
| Germany        | 74                                    | 68                                 | 89                                 | 39                                | 49                               |
| Hungary        | 89                                    | 66                                 | 88                                 | 13                                | 72                               |
| Italy          | 44                                    | 57                                 | 61                                 | 32                                | 28                               |
| Japan          | 16                                    | 25                                 | 37                                 | 44                                | 2                                |
| Korea          | 23                                    | 60                                 | 63                                 | 27                                | 3                                |
| Morocco        | 15                                    | 5                                  | 1                                  | 0                                 | 15                               |
| Netherlands    | 6                                     | 5                                  | 0                                  | 3                                 | 2                                |
| Spain          | 9                                     | 56                                 | 71                                 | 11                                | 18                               |
| Taiwan         | 6                                     | 38                                 | 63                                 | 27                                | 3                                |
| UK             | 43                                    | 47                                 | 33                                 | 22                                | 7                                |
| Uruguay        | 100                                   | 67                                 | 81                                 | 18                                | 17                               |
| USA            | 54                                    | 77                                 | 87                                 | 36                                | 30                               |
| Venezuela      | 81                                    | 66                                 | 90                                 | 54                                | 8                                |
| <b>Total</b>   | <b>38</b>                             | <b>52</b>                          | <b>59</b>                          | <b>27</b>                         | <b>24</b>                        |
